# Supplementary material for: Rhodanine-3-Acetamide Derivatives as Aldose and Aldehyde Reductase Inhibitors to Treat Diabetic Complications; Synthesis, Biological Evaluation and Molecular Docking Studies
Source: Research Square preprint supplement (doi:10.21203/rs.3.rs-54676/v2), 2020-10-22
Supplement: Supplementary file 1 [file b04812f5ed7f7282b6163221.docx]

**Scheme 1.** Synthesis of Rhodanine-3-acetamide derivatives
